# Supplementary material for: Single-Cell Radiation Response Scoring with the Deep Learning Algorithm CeCILE 2.0
Source: MDPI journal article supplement (doi:10.3390/cells12242782), 2023-12-07
Supplement: s1 [file s1]

Supplementary material for the manuscript:

# Single-Cell Radiation Response Scoring with the Deep Learning Algorithm CeCILE 2.0

Sarah Rudigkeit and Judith Reindl

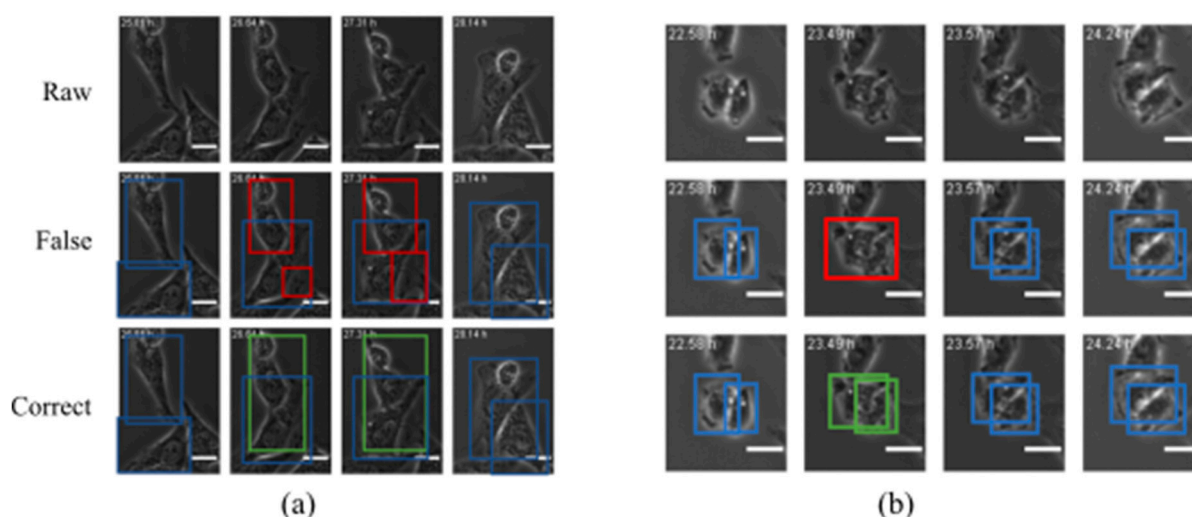

Supplementary Table S1: List of the data used for CeCILE 2.0

|    | # Frames | Intervals | Cell line | #liv | #round | #div | #dead | Total | Substrate    | Coating  | Irr                 |
|----|----------|-----------|-----------|------|--------|------|-------|-------|--------------|----------|---------------------|
| 1  | 11       | 100 min   | CHO-K1    | 1342 | 238    | 5    | 23    | 1608  | Glass        | Gelatine | H <sup>+</sup> 4Gy  |
| 2  | 10       | 100 min   | CHO-K1    | 2456 | 473    | 11   | 75    | 3015  | Glass        | Gelatine | H <sup>+</sup> 4Gy  |
| 3  | 11       | 100 min   | CHO-K1    | 208  | 167    | 1    | 40    | 416   | Glass        | Gelatine | No                  |
| 4  | 11       | 100 min   | CHO-K1    | 2526 | 346    | 9    | 33    | 2914  | Glass        | Gelatine | H <sup>+</sup> 4Gy  |
| 5  | 10       | 100 min   | CHO-K1    | 1608 | 373    | 8    | 122   | 2111  | Glass        | Gelatine | H <sup>+</sup> 4Gy  |
| 6  | 10       | 100 min   | CHO-K1    | 2209 | 352    | 9    | 44    | 2614  | Glass        | Gelatine | H <sup>+</sup> 4Gy  |
| 7  | 11       | 100 min   | CHO-K1    | 403  | 269    | 3    | 25    | 700   | Glass        | Gelatine | No                  |
| 8  | 11       | 100 min   | CHO-K1    | 365  | 167    | 2    | 18    | 552   | Glass        | Gelatine | H <sup>+</sup> 4Gy  |
| 9  | 70       | 20 min    | Hela      | 1135 | 209    | 3    | 1515  | 2862  | Scintillator | Celltak  | C <sup>6+</sup> 1Gy |
| 10 | 70       | 20 min    | Hela      | 2093 | 145    | 4    | 1669  | 3911  | Scintillator | Celltak  | C <sup>6+</sup> 2Gy |
| 11 | 42       | 20min     | Hela      | 2302 | 100    | 13   | 1573  | 3988  | Scintillator | Celltak  | C <sup>6+</sup> 4Gy |
| 12 | 42       | 20min     | Hela      | 1154 | 110    | 15   | 1331  | 2610  | Scintillator | Celltak  | No                  |
| 13 | 7        | 100 min   | CHO-K1    | 552  | 102    | 8    | 24    | 686   | Glass        | Gelatine | H <sup>+</sup> 4Gy  |

|    |    |        |        |      |     |    |     |      |         |          |    |
|----|----|--------|--------|------|-----|----|-----|------|---------|----------|----|
| 14 | 12 | Random | CHO-K1 | 967  | 101 | 13 | 91  | 1172 | Plastic | No       | No |
| 15 | 21 | Random | LN229  | 2108 | 119 | 38 | 82  | 2347 | Plastic | Gelatine | No |
| 16 | 17 | Random | LN229  | 1412 | 93  | 41 | 147 | 1693 | Plastic | Gelatine | No |
| 17 | 13 | Random | LN229  | 738  | 65  | 17 | 44  | 864  | Plastic | Gelatine | No |
| 18 | 4  | Random | LN229  | 244  | 51  | 7  | 25  | 327  | Plastic | Gelatine | No |
| 19 | 20 | Random | Hela   | 901  | 29  | 28 | 61  | 1019 | Plastic | No       | No |
| 20 | 20 | Random | Hela   | 982  | 35  | 25 | 10  | 1145 | Plastic | No       | No |

*Supplementary Table S2: Details for the videos used for tracking.*

|   | # Frames | Intervals | Cell line | #liv  | #round | #div | #dead | Total | Substrate | Coating | Irr        |
|---|----------|-----------|-----------|-------|--------|------|-------|-------|-----------|---------|------------|
| 1 | 457      | 5 min     | CHO-K1    | 24042 | 2447   | 106  | 540   | 32025 | Glass     | No      | X-rays 3Gy |
| 2 | 341      | 5 min     | CHO-K1    | 23574 | 1159   | 117  | 2704  | 27554 | Glass     | No      | No         |
